# Supplementary material
Source: PubMed Central journal article supplement (PMC10201307)
Supplement: mmc1.pdf [file mmc1.pdf]

**Cell Reports, Volume 42**

**Supplemental information**

**Omicron BQ.1.1 and XBB.1 unprecedentedly escape  
broadly neutralizing antibodies  
elicited by prototype vaccination**

**Bin Ju, Qing Fan, Congcong Liu, Senlin Shen, Miao Wang, Huimin Guo, Bing Zhou, Xiangyang Ge, and Zheng Zhang**

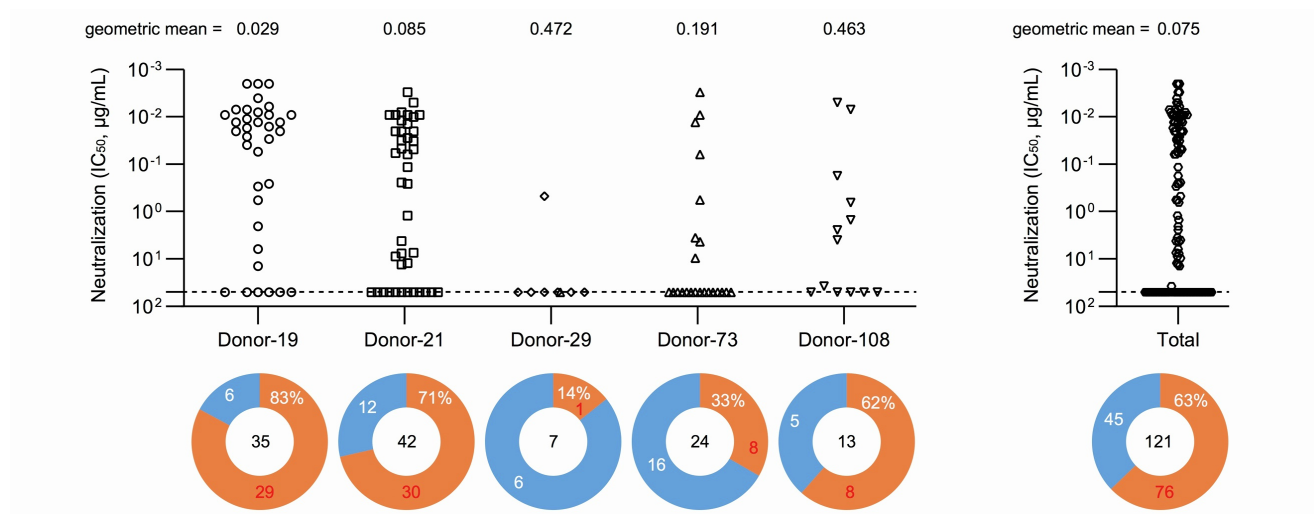

**Figure S1. Isolation of 121 SARS-CoV-2 WT RBD-specific mAbs, Related to Figure 1.**

Neutralization (IC<sub>50</sub>) of 121 mAbs against WT SARS-CoV-2, whose cut-off value was set as 50 µg/mL. Geometric mean potency was calculated by neutralization of less than 50 µg/mL. The data are means of at least two independent experiments. A total of 76 mAbs (63%) could effectively neutralize WT SARS-CoV-2 pseudovirus.

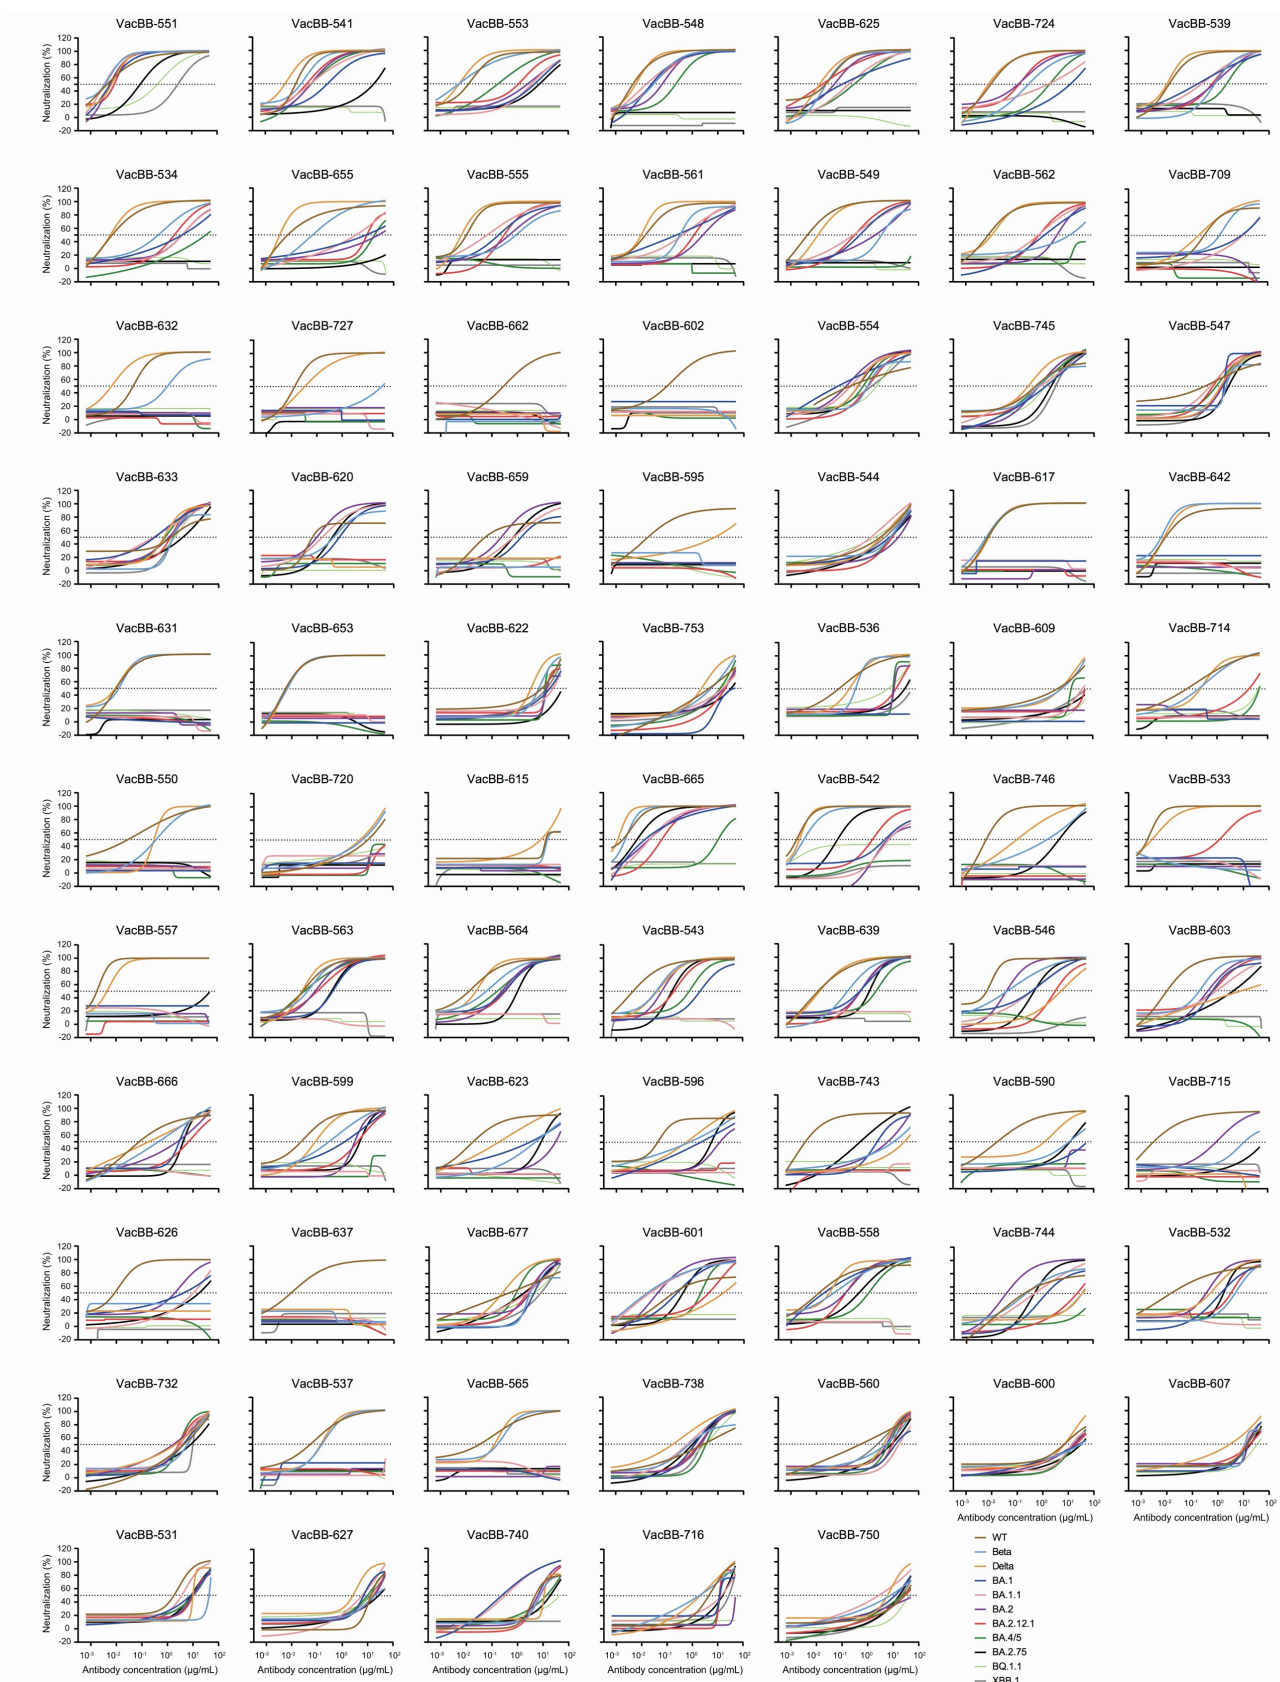

**Figure S2. Neutralization curves of 75 distinct nAbs against WT SARS-CoV-2, Beta, Delta, and various Omicron subvariants including BA.1, BA.1.1, BA.2, BA.2.12.1, BA.4/5, BA.2.75, BQ.1.1, and XBB.1, Related to Figure 1.**

A 50% reduction in viral infectivity was indicated by a horizontal dashed line. One out of at least two independent experiments with similar results.

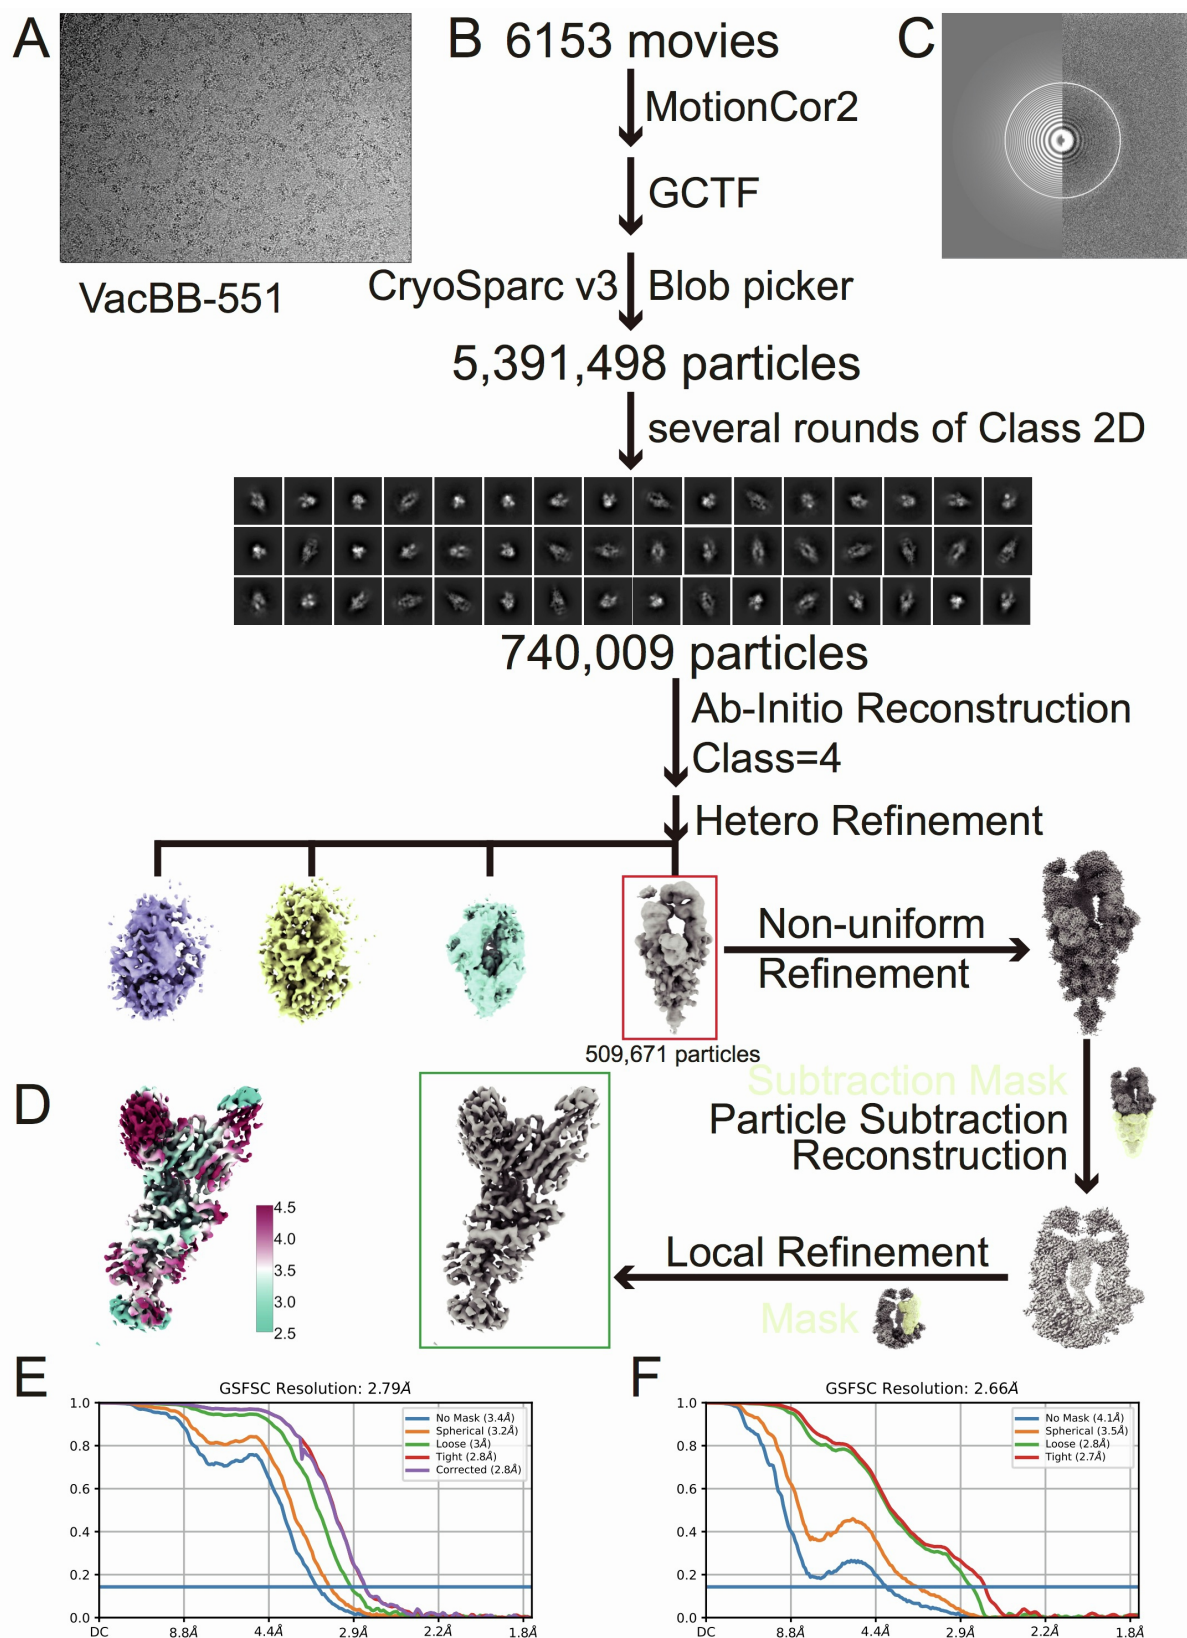

**Figure S3. Cryo-EM image-processing workflow for BA.2 spike: VacBB-551, Related to Figure 2.**

(A) Representative cryo-EM micrographs and CTF estimation result (C) of BA.2-S: VacBB-551. (B) Single-particle cryo-EM images processing workflow, local resolution estimation (D) and FSC curve for global (E) and local (F) resolution for the immune complex of SARS-CoV-2 Omicron BA.2 spike: VacBB-551.

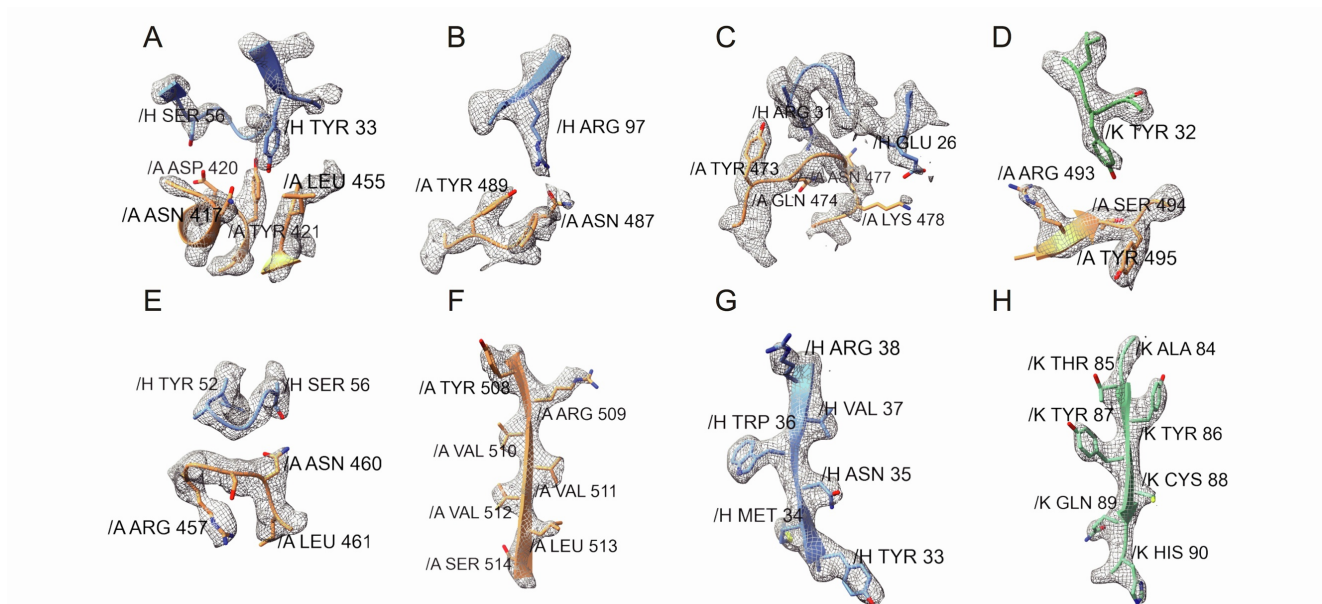

**Figure S4. Cryo-EM density maps for BA.2 spike: VacBB-551 complex, Related to Figure 2.**

**(A-E)** Local density maps and models for the interaction regions between VacBB-551 and BA.2 RBD. **(F)** Typical local density maps and models for BA.2 spike RBD. **(G, H)** Typical local density maps and models for heavy chain (G) and light chain (H) of VacBB-551. RBDs were colored by sand brown, heavy chain of VacBB-551 was colored by cornflower blue and light chain was colored by medium sea green.

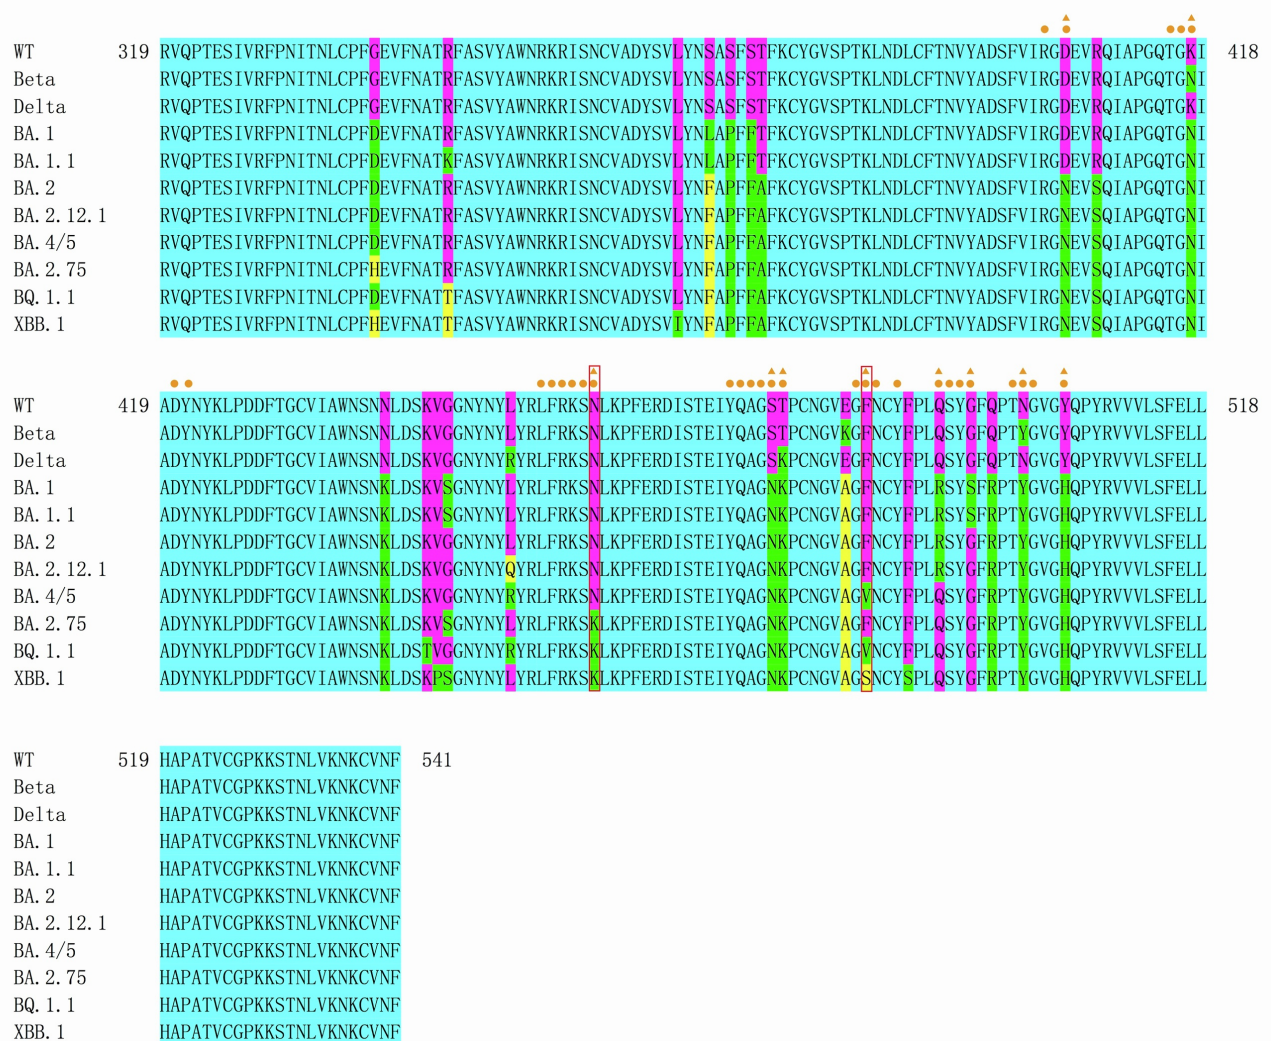

**Figure S5. Sequence alignment of RBD proteins among WT SARS-CoV-2, Beta, Delta, and Omicron subvariants including BA.1, BA.1.1, BA.2, BA.2.12.1, BA.4/5, BA.2.75, BQ.1.1, and XBB.1, Related to Figure 3.**

Epitope residues of VacBB-551 were indicated by orange solid circles. Non-conservative residues among epitope residues were indicated by orange solid triangles. Conserved residues were highlighted in cyan among different RBD proteins. The N460K in BA.2.75, BQ.1.1, and XBB.1, and F486V/S in BA.4/5, BQ.1.1, and XBB.1 were boxed out by the red line.

**Table S2. Cryo-EM data collection and processing, model building and refinement statistics, Related to Figure 2.**

| <b>Data Collection &amp; Processing</b>                                |                 |
|------------------------------------------------------------------------|-----------------|
|                                                                        | BA.2-S:         |
|                                                                        | VacBB-551       |
| Microscope                                                             | FEI Titan Krios |
| Camera                                                                 | Gatan K3        |
| Magnification                                                          | 105K            |
| Voltage(kV)                                                            | 300             |
| Automation software                                                    | EPU             |
| Total dose (e-/Å <sup>2</sup> )                                        | 50              |
| Frames                                                                 | 32              |
| Defocus range (μm)                                                     | -1.5-2.5        |
| Pixel size (Å/pixel)                                                   | 0.855           |
| Symmetry imposed                                                       | C1              |
| Micrographs used (no.)                                                 | 6153            |
| Initial particles images                                               | 5,391,498       |
| Final particles images                                                 | 509,671         |
| Overall resolution(Å)                                                  | 2.79            |
| Local resolution(Å)                                                    | 2.66            |
| <b>Model Building &amp; Refinement (Phenix 1.20 real-space-refine)</b> |                 |
| Composition                                                            |                 |
| Nonhydrogen atoms                                                      | 3116            |
| Protein residues                                                       | 396             |
| Ligands                                                                | 0               |
| Bonds (RMSD)                                                           |                 |
| Length (Å) (# > 4σ)                                                    | 0.0003(0)       |
| Angles (°) (# > 4σ)                                                    | 0.544(0)        |
| MolProbity score                                                       | 1.52            |
| Clashscore                                                             | 3.27            |
| Rotamer outliers (%)                                                   | 0.6             |
| Ramachandran plot                                                      |                 |
| Favored (%)                                                            | 94.10           |
| Allowed(%)                                                             | 5.38            |
| Outliers(%)                                                            | 0.51            |

**Table S3. Contacts between VacBB-551 and BA.2 RBD (distance cutoff 5 Å), Related to Figure 2.**

| VacBB-551 |                    |      |               |
|-----------|--------------------|------|---------------|
| RBD       | Heavy Chain        | RBD  | Light Chain   |
| T415      | S56, F58           | R403 | Y32, E91      |
| G416      | F58                | F486 | Q55, N56      |
| N417      | Y33, Y52           | S494 | Y32           |
| D420      | Y52, S56           | Y495 | Y32           |
| Y421      | Y33, Y52, A53, G54 | Y501 | P30           |
| L455      | Y33, G100          | G502 | G28           |
| F456      | Y33                | H505 | P30, H90, E91 |
| R457      | A53, G54           |      |               |
| K458      | S30, R31, A53      |      |               |
| S459      | G54                |      |               |
| N460      | G54, S56           |      |               |
| Y473      | R31, A53           |      |               |
| Q474      | R31                |      |               |
| A475      | I28, R31, N32, R97 |      |               |
| G476      | I28                |      |               |
| N477      | I28, R31           |      |               |
| K478      | G26                |      |               |
| F486      | R97, F105          |      |               |
| N487      | G26, R97           |      |               |
| Y489      | R97, L99, D104     |      |               |
| R493      | G100, R102         |      |               |

**Table S4. The list of primers used in this study, Related to STAR Methods.**

| Primer name     | Sequence (5'-3')                         |
|-----------------|------------------------------------------|
| WT_N460K-F      | CAGGAAGAGCAAACCTGAAACCATTGAGAGGGACAT     |
| WT_N460K-R      | TCAGTTTGCTCTTCCTGAACAGTCTGTAGAGG         |
| WT_F486V-F      | GGAGGGCGTAAACTGTTACTTTCCACTCCAATCCT      |
| WT_F486V-R      | AACAGTTTACGCCCTCCACTCCATTACATGGT         |
| WT_F486S-F      | GAGGGCTCCAACCTGTTACTTTCCACTCCAATCCT      |
| WT_F486S-R      | TAACAGTTGGAGCCCTCCACTCCATTACATGG         |
| BA.2_N460K-F    | AAGTCCAAGCTGAAACCTTTCGAGAGGGACAT         |
| BA.2_N460K-R    | GGTTTCAGCTTGGACTTTCTGAACAGTCTATACAGGTAGT |
| BA.2_F486V-F    | CGGCGTTAACTGCTACTTTCCTCTGAGAAGCTA        |
| BA.2_F486V-R    | AGTAGCAGTTAACGCCGGCCACGCCGTTGCAG         |
| BA.2_F486S-F    | CGGCTCTAACTGCTACTTTCCTCTGAGAAGCTA        |
| BA.2_F486S-R    | AGTAGCAGTTAGAGCCGGCCACGCCGTTGCAG         |
| BA.2.75_K460N-F | GAAGAGCAACCTCAAGCCTTTCGAGAGAGACATC       |
| BA.2.75_K460N-R | GCTTGAGGTTGCTCTTCCGAAACAGTCTGTACAG       |
| BQ.1.1_K460N-F  | AAAGTCCAACCTGAAGCCCTTCGAGAGAGATATC       |
| BQ.1.1_K460N-R  | GCTTCAGGTTGGACTTTCTGAACAGTCTGTAGCG       |
| BQ.1.1_V486F-F  | GCCGGCTTCAACTGTTACTTCCCTCTGCAGAGC        |
| BQ.1.1_V486F-R  | TAACAGTTGAAGCCGGCCACGCCGTTACAAGG         |
| XBB.1_K460N-F   | GAAGAGCAACCTGAAGCCTTTCGAGAGGGATA         |
| XBB.1_K460N-R   | GCTTCAGGTTGCTCTTCCGGAACAGTCTATACAGG      |
| XBB.1_S486F-F   | CGGGTTCAACTGCTACAGCCCCCTGCAGAGCT         |
| XBB.1_S486F-R   | TGTAGCAGTTGAACCCGGCGACGCCATTACAA         |
